# Supplementary material for: How Much Is Too Much? Dose-Dependent Gallstone Risk from Weight Loss and the Role of Serum Cholesterol: Evidence from NHANES 2017–2020
Source: Research Square preprint supplement (doi:10.21203/rs.3.rs-7132076/v1), 2025-08-19
Supplement: Supplementary file 1 [file 9ba771a740c1e196b2c1c545.doc]

Supplementary Table 1: Twenty-one weight loss methods in the NHANES database

| Code | weight loss methods | Nubmer | |
| --- | --- | --- | --- |
| Yes | No |
| WHD080A | Ate less to lose weight | 925 | 3233 |
| WHD080B | Switched to foods with lower calories | 470 | 3233 |
| WHD080C | Ate less fat to lose weight | 488 | 3233 |
| WHD080D | Exercised to lose weight | 882 | 3233 |
| WHD080E | Skipped meals | 316 | 3233 |
| WHD080F | Ate diet foods or products | 108 | 3233 |
| WHD080G | Used a liquid diet formula | 76 | 3233 |
| WHD080H | Joined a weight loss program | 56 | 3233 |
| WHD080I | Took prescription diet pills | 24 | 3233 |
| WHD080J | Took non-RX suppl. to lose weight | 63 | 3233 |
| WHD080K | Took laxatives or vomited | 18 | 3233 |
| WHD080L | Other | 9 | 3233 |
| WHD080M | Drank a lot of water | 752 | 3233 |
| WHD080N | Followed a special diet | 84 | 3233 |
| WHD080O | Ate fewer carbohydrates | 535 | 3233 |
| WHD080P | Started to smoke or began to smoke again | 13 | 3233 |
| WHD080Q | Ate more fruits, vegetables, salads | 777 | 3233 |
| WHD080R | Changed eating habits | 573 | 3233 |
| WHD080S | Ate less sugar, candy, sweets | 627 | 3233 |
| WHD080T | Ate less junk food or fast food | 661 | 3233 |
| WHD080U | Had weight loss surgery to lose weight | 3 | 3233 |

For the statistical analysis of weight loss methods, only participants who responded "Yes" to the question WHQ070 - "Tried to lose weight in past year?" are included. Those who answered "No" are simply recorded as "No" in the relevant statistics. Additionally, WHDK, WHDL, WHDP, and WHDU were excluded from the final analysis due to insufficient sample sizes.

**Supplementary Table 2:** Causal mediation analysis of TC between %TWL and GSD

| Type | Estimate (95 % CI) | P value | Estimate (95 % CI) | | P value |
| --- | --- | --- | --- | --- | --- |
| Model 1 | | Model 2 | | |
| Total Effect | 0.00273  (0.00186,0.00358) | <0.001 | 0.00181  (0.00071,0.00278) | 0.002 | |
| ACME (Average) | 0.00003  (-0.00003,0.00011) | 0.372 | 0.000054  (0.000004,0.000137) | 0.036 | |
| ADE (Average) | 0.00270  (0.00183,0.00356) | <0.001 | 0.00176  (0.00066,0.00275) | 0.004 | |
| Proportion mediated  (Average) | 0.00953  (-0.0109,0.0413) | 0.372 | 0.0281  (0.00195,0.09618) | 0.038 | |

Supplementary Table 3: Results of Univariate and Multivariate Logistic Regression Analyses on the Association Between Different Weight Loss Methods After Classification and Gallstones

| Characteristic | Univariate logistic regression | | Multivariate logistic regression | |
| --- | --- | --- | --- | --- |
| OR (95% CI) | P-value | OR (95% CI) | P-value |
| Conventional Dietary Control | 1.47 (1.25, 1.73) | <0.001 | 1.07 (0.85, 1.34) | 0.559 |
| Healthy Dietary Optimization | 1.24 (1.05, 1.47) | 0.012 | 0.98 (0.78, 1.23) | 0.861 |
| Exercise and Lifestyle Modification | 1.13 (0.96, 1.34) | 0.144 | 0.98 (0.78, 1.23) | 0.854 |
| Extreme Dietary Restriction or Meal Replacement | 1.50 (1.21, 1.84) | <0.001 | 1.28 (0.97, 1.68) | 0.075 |
| Pharmacologic or Product-Based Interventions | 1.29 (0.95, 1.71) | 0.097 | 1.02 (0.68, 1.48) | 0.936 |
| Surgical or Behavioral Interventions | 1.20 (0.52, 2.37) | 0.638 | 0.74 (0.24, 1.84) | 0.550 |


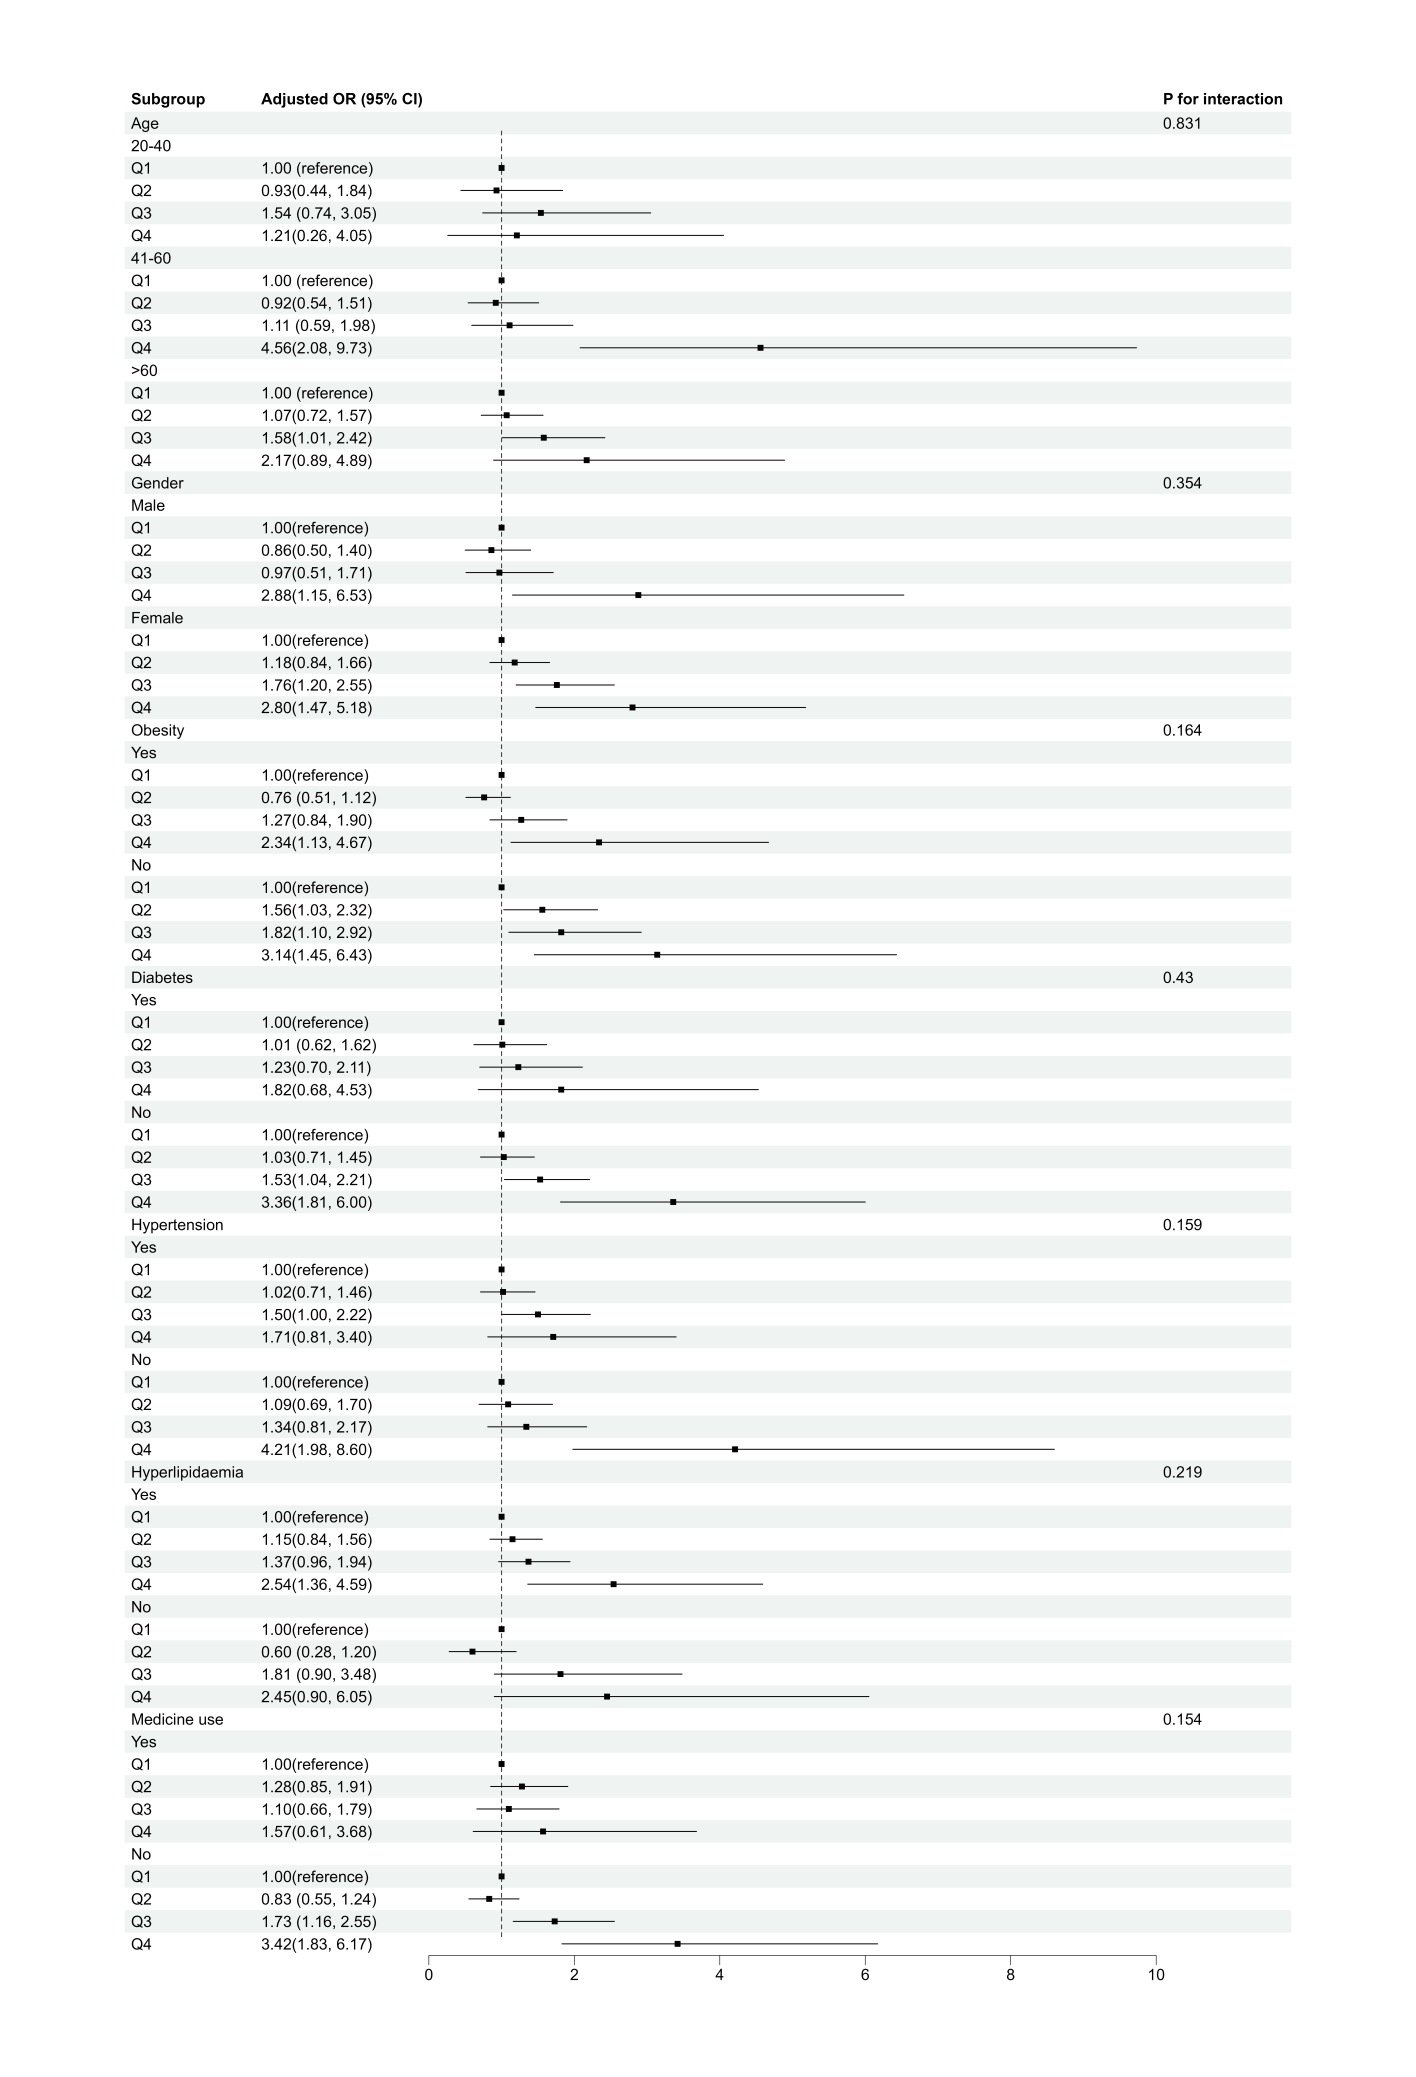


**Supplementary Figure 1:** Subgroup Analysis of %TWL and GSD Prevalence. This figure presents the results of subgroup analysis evaluating the influence of demographic and health factors on the relationship between%TWL and the prevalence of GSD. Stratification factors included age, gender, obesity, T2DM, hypertension, hyperlipidemia and medicine use.
